# Supplementary material for: The German Communities That Care Youth Survey: dimensionality and validity of risk factors
Source: Frontiers journal article supplement (doi:10.3389/fpubh.2024.1472347), 2024-09-30
Supplement: Table_1.PDF [file Table_1.PDF]

## Appendix A Additional File 1 — Unidimensionality supplement

### Additional File 1 — Unidimensionality supplement

| Scale | Item                                     | $\lambda$                                                                                                                          |
|-------|------------------------------------------|------------------------------------------------------------------------------------------------------------------------------------|
| IR1   | Rebelliousness                           | f27.5 I like to try out how far I can go. .588                                                                                     |
|       |                                          | f27.6 I don't stick to rules I don't like. .640                                                                                    |
|       |                                          | f27.8 I sometimes deliberately don't do what people tell me to do just to annoy them. .690                                         |
| IR3   | Early initiation of antisocial behaviour | f23.1.2 <sub>cr</sub> behaved in such a way that you were excluded from lessons by a conference? .589                              |
|       |                                          | f23.2.2 <sub>cr</sub> deliberately broke something that doesn't belong to you? .599                                                |
|       |                                          | f23.3.2 <sub>cr</sub> participated in a violent or criminal youth gang? .784                                                       |
|       |                                          | f23.4.2 <sub>cr</sub> stolen something from a shop? .621                                                                           |
|       |                                          | f23.5.2 <sub>cr</sub> been arrested by the police? .705                                                                            |
|       |                                          | f23.6.2 <sub>cr</sub> been involved in a fight? .641                                                                               |
|       |                                          | f23.7.2 <sub>cr</sub> assaulted someone in order to seriously injure him or her? .620                                              |
|       |                                          | f23.8.2 <sub>cr</sub> threatened someone to get money? .664                                                                        |
|       |                                          | f23.9.2 <sub>cr</sub> sold stolen things? .871                                                                                     |
|       |                                          | f23.10.2 <sub>cr</sub> stolen something at school? .560                                                                            |
|       |                                          | f23.11.2 <sub>cr</sub> carried a weapon (e.g. a knife)? .709                                                                       |
|       |                                          | f23.12.2 <sub>cr</sub> sprayed graffiti on other people's property? .651                                                           |
|       |                                          | f23.13.2 <sub>cr</sub> illegally downloaded music or films from the internet? .484                                                 |
|       |                                          | f23.14.2 <sub>cr</sub> bullied someone at school or on the internet? .594                                                          |
| IR4   | Early initiation of drug use             | f37.1.2 <sub>cr</sub> drunk beer .783                                                                                              |
|       |                                          | f37.2.2 <sub>cr</sub> drunk wine/champagne .743                                                                                    |
|       |                                          | f37.3.2 <sub>cr</sub> drunk mixed drinks .873                                                                                      |
|       |                                          | f37.4.2 <sub>cr</sub> drunk liquor .873                                                                                            |
|       |                                          | f37.5.2 <sub>cr</sub> smoked cigarettes/tobacco (shisha, pipe snus) .693                                                           |
|       |                                          | f37.7.2 <sub>cr</sub> hash/marijuana .607                                                                                          |
|       |                                          | f37.8.2 <sub>cr*</sub> other illegal drugs (ecstasy, speed, LSD, cocaine, crystal or heroin) —                                     |
|       |                                          | f37.10.2 <sub>cr*</sub> prescription drugs without a prescription from a doctor (e.g. tranquillisers, stimulants or painkillers) — |
| IR5   | Attitudes favourable to drug use         | f19.2 often drinks alcohol? .768                                                                                                   |
|       |                                          | f19.3 does hash/marijuana? .899                                                                                                    |

Additional File 1 — Unidimensionality supplement

| Scale |                                              | Item                                                                                                                   | $\lambda$ |
|-------|----------------------------------------------|------------------------------------------------------------------------------------------------------------------------|-----------|
|       |                                              | f19.4 other illegal drugs (ecstasy, speed, LSD, cocaine, crystal, heroin)?                                             | .867      |
|       |                                              | f19.1 smokes cigarettes?                                                                                               | .878      |
|       |                                              | f19.11 takes prescription drugs without a prescription from a doctor (e.g. tranquillisers, stimulants or painkillers)? | .440      |
| IR6   | Attitudes favourable to antisocial behaviour | f19.5 has a weapon with them (e.g. a knife)?                                                                           | .683      |
|       |                                              | f19.6 steals something?                                                                                                | .806      |
|       |                                              | f19.7 starts a fight?                                                                                                  | .789      |
|       |                                              | f19.8 attacks someone with the intention of physically harming him/her?                                                | .814      |
|       |                                              | f19.9 skips school?                                                                                                    | .612      |
| IR7   | Peer drug use                                | f20.1 smoked cigarettes.                                                                                               | .885      |
|       |                                              | f20.2 drunk alcohol.                                                                                                   | .773      |
|       |                                              | f20.3 used hash/marijuana.                                                                                             | .904      |
|       |                                              | f20.4 taken other illegal drugs (ecstasy, speed, LSD, cocaine, crystal or heroin).                                     | .853      |
| IR8   | Peer antisocial behaviour                    | f20.5 sold hash/marihuana.                                                                                             | .821      |
|       |                                              | f20.6 sold other illegal drugs (ecstasy, speed, LSD, cocaine, crystal or heroin).                                      | .841      |
|       |                                              | f20.7 skipped school frequently.                                                                                       | .614      |
|       |                                              | f20.8 carried a weapon (e.g., a knife)                                                                                 | .707      |
|       |                                              | f20.9 stolen something precious (e.g., a cell phone or a bike).                                                        | .789      |
|       |                                              | f20.10 arrested for a misdemeanor by police.                                                                           | .881      |
|       |                                              | f20.11 left school without graduating.                                                                                 | .687      |
|       |                                              | f20.12 participated in a violent or criminal group (gang).                                                             | .785      |
| IR9   | Peer rewards for antisocial behaviour        | f21.1 smoke cigarettes.                                                                                                | .849      |
|       |                                              | f21.2 drink alcohol                                                                                                    | .766      |
|       |                                              | f21.3 use hash/marijuana.                                                                                              | .896      |
|       |                                              | f21.4 have a weapon with you (e.g. a knife).                                                                           | .697      |
| IR10  | Sensation seeking                            | f29.1 I did what I enjoyed without considering the consequences.                                                       | .704      |
|       |                                              | f29.2 I did something dangerous because someone challenged me.                                                         | .798      |
|       |                                              | f29.3 I did crazy things, even if they were a bit dangerous.                                                           | .826      |

Additional File 1 — Unidimensionality supplement

| Scale |                                                        | Item                                                                                       | $\lambda$ |
|-------|--------------------------------------------------------|--------------------------------------------------------------------------------------------|-----------|
| IR12  | Perceived risks of drug use                            | drugrisk1 <sub>r</sub> smokes one or more packets of cigarettes a day?                     | .703      |
|       |                                                        | drugrisk2 <sub>r</sub> tried hash/marijuana once or twice?                                 | .481      |
|       |                                                        | drugrisk3 <sub>r</sub> uses hash/marijuana regularly (once or twice a week)?               | .688      |
|       |                                                        | drugrisk4 <sub>r</sub> drinks one or two glasses of alcohol (wine, beer) almost every day? | .650      |
| FR1   | Family history of antisocial behaviour                 | f44.1 used drugs?                                                                          | .852      |
|       |                                                        | f44.2 sold drugs?                                                                          | .828      |
|       |                                                        | f44.3 had a drinking problem?                                                              | .572      |
|       |                                                        | f44.4 had a drug problem?                                                                  | .978      |
| FR2   | Poor family management                                 | f45.1 <sub>r</sub> The rules in my family are clear.                                       | .543      |
|       |                                                        | f45.3 <sub>r</sub> If I'm not at home, my parents know where I am.                         | .615      |
|       |                                                        | f45.6 <sub>r</sub> My parents want me to call if I come home late.                         | .482      |
|       |                                                        | f45.7 <sub>r</sub> My parents would find out if I take drugs or drink alcohol.             | .700      |
|       |                                                        | f45.8 <sub>r</sub> My parents would find out if I skip school.                             | .632      |
|       |                                                        | f45.9 <sub>r</sub> In my family there are clear rules about alcohol and drugs.             | .714      |
|       |                                                        | f45.10 <sub>r</sub> My parents ask me if I have done my homework.                          | .507      |
|       |                                                        | f45.12 <sub>r</sub> If I came home late, my parents would find out.                        | .546      |
| FR3   | Family conflict                                        | f45.2 In my family we often shout at each other or call each other names.                  | .889      |
|       |                                                        | f45.4 We always argue about the same things in our family.                                 | .701      |
|       |                                                        | f46.11 There is often a bad argument in our family.                                        | .764      |
| FR4   | Parental attitudes favourable to drug use              | f43.2 drink alcohol?                                                                       | .699      |
|       |                                                        | f43.3 smoke cigarettes?                                                                    | .888      |
|       |                                                        | f43.4 use hash/marijuana?                                                                  | .788      |
| FR5   | Parental attitudes favourable to anti-social behaviour | f43.1 skip school?                                                                         | .443      |
|       |                                                        | f43.5 steal something?                                                                     | .846      |
|       |                                                        | f43.6 break things in your neighbourhood?                                                  | .716      |
|       |                                                        | f43.7 get into a fight with someone?                                                       | .647      |
| SR1   | Academic failure                                       | f15 How would you rate your overall school performance in the last year?                   | —         |
|       |                                                        | f17.7 I often do worse at school than my classmates.                                       | —         |

Additional File 1 — Unidimensionality supplement

| Scale |                                 | Item               |                                                                                                                                     | $\lambda$ |
|-------|---------------------------------|--------------------|-------------------------------------------------------------------------------------------------------------------------------------|-----------|
| SR2   | Low commitment to school        | f18.1 <sub>r</sub> | At school I concentrate on the lessons.                                                                                             | .605      |
|       |                                 | f18.2 <sub>r</sub> | I try hard in my homework.                                                                                                          | .548      |
|       |                                 | f18.3              | I hate going to school.                                                                                                             | .532      |
|       |                                 | f18.4 <sub>r</sub> | I find my homework useful and important.                                                                                            | .702      |
|       |                                 | f18.5 <sub>r</sub> | I like going to school very much.                                                                                                   | .701      |
|       |                                 | f16 <sub>c</sub>   | How many days have you skipped school in the last four weeks?                                                                       | .487      |
|       |                                 | f18.6 <sub>r</sub> | I find the lessons very interesting most of the time.                                                                               | .829      |
|       |                                 | f18.7 <sub>r</sub> | I find the things I learn at school important for my later life.                                                                    | .679      |
| CR1   | Low neighborhood attachment     | f40.5 <sub>r</sub> | I like my neighborhood.                                                                                                             | .832      |
|       |                                 | f40.7              | I'd like to get out of my neighborhood.                                                                                             | .811      |
|       |                                 | f41.1 <sub>r</sub> | If I had to move, I would miss the neighborhood I now live in.                                                                      | .860      |
| CR2   | Community disorganisation       | f42.1              | There is a lot of unauthorised graffiti in my neighbourhood.                                                                        | .713      |
|       |                                 | f42.2              | In my neighbourhood there is a lot of rubbish on the street.                                                                        | .626      |
|       |                                 | f42.3              | In my neighbourhood there is a lot of crime, e.g. robberies and burglaries.                                                         | .798      |
|       |                                 | f42.4              | There are people dealing drugs in my neighbourhood.                                                                                 | .794      |
|       |                                 | f42.5              | There are often fights in my neighbourhood.                                                                                         | .933      |
|       |                                 | f40.6 <sub>r</sub> | I feel safe in my neighbourhood.                                                                                                    | .451      |
| CR3   | Transitions and mobility        | f11 <sub>c</sub>   | How many times have you changed homes since kindergarten?                                                                           | .932      |
|       |                                 | f12                | Have you changed homes in the past year?                                                                                            | .668      |
|       |                                 | f13 <sub>c</sub>   | How many times have you changed schools (including changing from elementary to middle or middle to high school) since kindergarten? | .597      |
|       |                                 | f14                | Have you changed schools (including changing from elementary to middle or middle to high school) in the past year?                  | .689      |
| CR4   | Perceived availability of drugs | f39.1              | marijuana?                                                                                                                          | .819      |
|       |                                 | f39.2              | cocaine, LSD, or amphetamines?                                                                                                      | .769      |
|       |                                 | f39.3              | beer, wine, or hard liquor?                                                                                                         | .870      |
|       |                                 | f39.4              | cigarettes?                                                                                                                         | .908      |
|       |                                 | f39.7              | prescription medicines without a prescription from a doctor?                                                                        | .546      |

Additional File 1 — Unidimensionality supplement

| Scale | Item                                               |                                                                                                                                                 | $\lambda$ |
|-------|----------------------------------------------------|-------------------------------------------------------------------------------------------------------------------------------------------------|-----------|
| CR5   | Perceived availability of handguns                 | f39.5 If you wanted to get a handgun, how easy would it be for you to get one?                                                                  | —         |
| CR6   | Laws and norms favourable to anti-social behaviour | f40.1 If a young person or child in your neighbourhood breaks something, do the neighbours talk to him/her?                                     | .742      |
|       |                                                    | f40.2 If a young person or child in your neighbourhood treats other young people or children in a mean way: Do the neighbours speak to him/her? | .827      |
|       |                                                    | f40.3 If there was a serious fight among the youths/children in your neighbourhood: Would the neighbours call the police?                       | .491      |
|       | Violence                                           | f23.2.1 intentionally broken something that doesn't belong to you?                                                                              | .633      |
|       |                                                    | f23.3.1 joined a violent or criminal youth gang?                                                                                                | .847      |
|       |                                                    | f23.6.1 been involved in a fight?                                                                                                               | .721      |
|       |                                                    | f23.7.1 attacked someone to seriously hurt him or her?                                                                                          | .669      |
|       |                                                    | f23.8.1 threatened someone to get money?                                                                                                        | .874      |
|       |                                                    | f23.11.1 had a weapon with you (e.g. a knife)?                                                                                                  | .705      |
|       | Delinquency                                        | f23.4.1 stolen something from a store?                                                                                                          | .731      |
|       |                                                    | f23.5.1 been arrested by the police?                                                                                                            | .805      |
|       |                                                    | f23.9.1 sold stolen items?                                                                                                                      | .986      |
|       |                                                    | f23.10.1 stolen something at school?                                                                                                            | .679      |
|       |                                                    | f23.12.1 sprayed graffiti on someone else's property?                                                                                           | .696      |
|       |                                                    | f23.13.1 illegally downloaded music or movies from the internet?                                                                                | .455      |
|       |                                                    | f23.14.1 bullied someone at school or online?                                                                                                   | .573      |
|       | Substance use                                      | f37.1.1 beer                                                                                                                                    | .659      |
|       |                                                    | f37.2.1 wine/sparkling wine                                                                                                                     | .552      |
|       |                                                    | f37.3.1 mixed drinks                                                                                                                            | .700      |
|       |                                                    | f37.4.1 hard liquor                                                                                                                             | .672      |
|       |                                                    | f37.5.1 cigarettes/tobacco (shisha, pipe, snus)                                                                                                 | .937      |
|       |                                                    | f37.7.1 hash/marijuana                                                                                                                          | .875      |
|       |                                                    | f37.8.1 other illegal drugs (ecstasy, speed, LSD, cocaine, crystal, or heroin)                                                                  | .787      |
|       |                                                    | f37.10.1 prescription drugs without a prescription from a doctor (e.g. tranquillisers, stimulants, or painkillers)                              | .427      |
|       |                                                    | f38 Please think back to the last four weeks. During this time, how often have you had 5 or more alcoholic drinks in one evening?               | .672      |
|       | Depressive symptomatology                          | f27.9 Sometimes I think my life is worth nothing.                                                                                               | .949      |
|       |                                                    | f27.10 Sometimes I think I'm good for nothing.                                                                                                  | .925      |

Additional File 1 — Unidimensionality supplement

| Scale | Item                                                                                                  | $\lambda$ |
|-------|-------------------------------------------------------------------------------------------------------|-----------|
|       | f27.11 I often think I'm a failure.                                                                   | .954      |
|       | f27.12 For the past year, I've felt depressed or sad most days,<br>although some days I've felt okay. | .786      |

*Note. c = categorised; r = recoded; \* = excluded due to local misfit.*
