# Supplementary material for: The German Communities That Care Youth Survey: dimensionality and validity of risk factors
Source: Frontiers journal article supplement (doi:10.3389/fpubh.2024.1472347), 2024-09-30
Supplement: Table_2.PDF [file Table_2.PDF]

## Additional File 2 — Concurrent criterion validity supplement.

Additional File 2 — Concurrent criterion validity supplement.

| scale            | <i>n</i> | free param-<br>eters | $\chi^2$ | df  | <i>p</i> | CFI  | RMSEA [90 % CI]   | SRMR |
|------------------|----------|----------------------|----------|-----|----------|------|-------------------|------|
| IR1              | 1900     | 141                  | 990.917  | 351 | <.001    | .989 | .031 [.029, .033] | .097 |
| IR3 <sup>1</sup> | 1900     | 209                  | 785.827  | 307 | <.001    | .991 | .029 [.026, .031] | .131 |
| IR4 <sup>2</sup> | 1900     | 109                  | 808.044  | 216 | <.001    | .985 | .038 [.035, .041] | .107 |
| IR5              | 1910     | 150                  | 1911.888 | 407 | <.001    | .977 | .044 [.042, .046] | .102 |
| IR6              | 1910     | 150                  | 1279.670 | 407 | <.001    | .985 | .034 [.031, .036] | .093 |
| IR7              | 1911     | 149                  | 1704.899 | 379 | <.001    | .979 | .043 [.041, .045] | .106 |
| IR8              | 1911     | 174                  | 1213.081 | 496 | <.001    | .987 | .028 [.026, .029] | .088 |
| IR9              | 1908     | 150                  | 1533.985 | 378 | <.001    | .978 | .040 [.038, .042] | .101 |
| IR10             | 1900     | 144                  | 972.062  | 351 | <.001    | .989 | .031 [.028, .033] | .095 |
| IR12             | 1902     | 146                  | 1274.798 | 378 | <.001    | .985 | .035 [.033, .037] | .096 |
| FR1              | 1904     | 138                  | 995.039  | 378 | <.001    | .989 | .029 [.027, .032] | .097 |
| FR2              | 1904     | 167                  | 1451.465 | 495 | <.001    | .985 | .032 [.030, .034] | .090 |
| FR3              | 1904     | 141                  | 939.055  | 351 | <.001    | .990 | .030 [.027, .032] | .095 |
| FR4              | 1905     | 141                  | 1322.714 | 351 | <.001    | .984 | .038 [.036, .040] | .105 |
| FR5              | 1905     | 145                  | 1195.375 | 379 | <.001    | .986 | .034 [.031, .036] | .097 |
| SR1              | 1904     | 139                  | 912.174  | 324 | <.001    | .990 | .031 [.029, .033] | .097 |
| SR2              | 1911     | 173                  | 1806.183 | 497 | <.001    | .980 | .037 [.035, .039] | .092 |
| CR1              | 1903     | 141                  | 1002.257 | 351 | <.001    | .989 | .031 [.029, .034] | .096 |
| CR2              | 1903     | 156                  | 1499.647 | 435 | <.001    | .982 | .036 [.034, .038] | .095 |
| CR3              | 1911     | 138                  | 964.230  | 378 | <.001    | .990 | .028 [.026, .031] | .098 |
| CR4              | 1903     | 152                  | 1394.758 | 405 | <.001    | .985 | .036 [.034, .038] | .097 |
| CR5 <sup>3</sup> | 1775     | 112                  | 805.004  | 299 | <.001    | .990 | .031 [.028, .033] | .108 |
| CR6              | 1902     | 141                  | 952.864  | 351 | <.001    | .990 | .030 [.028, .032] | .096 |

*Note.* <sup>1</sup> Model calculation was only possible for substance use and depressive symptomatology due to non-convergence. <sup>2</sup> Model calculation was only possible for violence, delinquency, and depressive symptomatology due to non-convergence. <sup>3</sup> CR5 comprises only one item; this was dichotomised as hard/easy to allow calculation of concurrent criterion validity. Due to no or very few cases in the substance use categories indicating frequent use, model calculation was only possible when those substance use categories were collapsed to > 6 time in the last 4 weeks.
